# Supplementary material for: The Relationship Between Perceived Stress and Demographic and Lifestyle Variables Among University Students Diagnosed with Bruxism: A Cross-Sectional Analytical Study
Source: Research Square preprint supplement (doi:10.21203/rs.3.rs-7133597/v1), 2025-09-22
Supplement: Supplementary file 1 [file 9c18ca58ddec3b4c8b6039f0.xlsx]

## Sheet: Sayfa 1
Bruxism_Data_with_Extracted_Diagnosis_Year
Gender	Birth Year	Marital Status	University	Department and Faculty	Grade Level	7. sütun	GPA (Optional)	Bruxism Diagnosis Info	Diagnosing Specialist	daha önce psikolojik danışmanlık aldınız mı	stresle baş etme konusunda profesyonel destek aldınız mı	günde kaç saat uyuyorsunuz	sigara kullanıyor musunuz	düzenli olarak kafein*kahve-enerji içeceği vb.*tüketiyor musunuz	spor yapıyor musunuz	günlük ortalama ders çalışma süreniz	sınav dönemlerinde kendinizi ne kadar stresli hissediyorsunuz	bruksizim*Dentistry sıkma*belirtileriniz sınav dönemlerinde artıyor mu	bölümünüzün genel stres düzeyini nasıl değerlendirirsiniz	Stres/rahatsızlık algısı	Hayatındaki önemli şeyleri kontrol edemediğini hissetme	Kendini sinirli ve stresli hissetme	Beklenmedik bir şeylerin olması nedeniyle rahatsızlık duyma	Anger Due to Uncontrollable Events	Feeling Things Aren’t Going Well	Feeling Problems Are Overwhelming	Yetersiz özyeterlik algısı	Her şeyin üstesinden gelemediğini hissetme	Lack of Confidence in Handling Personal Issues	Feeling Unable to Control Life Difficulties	Realizing Inability to Cope With Responsibilities	Total Stress Score	Diagnosis Status	Diagnosis Year
female	2001	single	Van yüzüncü yıl üniversitesi	Faculty of Education	3rd year		3.4	20/03/2025	other	no	no	6-8 hour	no	yes	no	3-5 hour	very	emin değilim	yüksek	very often	very often	very often	very often	very often	5	5	very often	often	4	5	very often	19	Diagnosed	2025.0
female	2000	single	Van yüzüncü yıl üniversitesi	Dentistry	graduate				dentist	no	no	4-6 hour	no	yes	no	1 houren az	very	yes	yüksek	sometimes	often	often	sometimes	sometimes	3	3	sometimes	often	3	3	sometimes	12	Not Diagnosed
female	2005	single	Cukurova	LAV	1st year				dentist	no	no	6-8 hour	no	no	no	1-3 hour	low	emin değilim	yüksek	sometimes	never	rarely	rarely	never	1	1	never	never	1	1	never	4	Not Diagnosed
male	2006	married	Konya teknik üniversitesi	Engineering	1st year		2.6	No diagnosis but aware of bruxism	other	no	no	6-8 hour	no	no	no	3-5 hour	moderate	emin değilim	yüksek	sıksık	rarely	often	sometimes	rarely	3	2	never	never	1	1	never	7	Not Diagnosed
female	2003	single	Çukurova	LAV	2nd year			31.01.2025	dentist	no	no	6-8 hour	no	no	no	1 houren az	very	yes	yüksek	sıksık	very often	very often	very often	often	5	5	very often	very often	5	5	very often	20	Diagnosed	2025.0
female	2004	single	Çukurova Üniversitesi	LAV	2nd year				dentist	no	no	6-8 hour	no	yes	yes	1-3 hour	low	emin değilim	yüksek	sometimes	sometimes	often	often	very often	4	3	often	sometimes	2	2	rarely	11	Not Diagnosed
male	2002	single	Çukurova üniversitesi	LAV	2nd year			Tanı konmadı	other	no	no	8 hourten fazla	yes	yes	no	1 houren az	moderate	yes	moderate	sometimes	sometimes	often	sometimes	sometimes	3	3	rarely	rarely	2	2	rarely	10	Diagnosed
male	2005	single	Atü	Engineering	1st year		4.0	Almadım gece yapıyorum yıllardır	other	yes	no	6-8 hour	no	no	yes	5 hourten fazla	very	emin değilim	yüksek	sıksık	very often	often	sometimes	sometimes	2	4	rarely	often	2	4	often	12	Diagnosed
female	2001	single	ÇUKUROVA ÜNİVERSİTESİ	LAV	4th year		2.3	1 ocak 2024	nörolog	yes	no	6-8 hour	no	no	no	1-3 hour	moderate	yes	yüksek	very often	very often	very often	sometimes	sometimes	5	5	very often	very often	3	5	often	18	Diagnosed	2024.0
male	1987	single	Çukurova	LAV	2nd year		2.5	Devam ediyor	dentist	no	no	6-8 hour	yes	yes	yes	5 hourten fazla	very	emin değilim	yüksek	very often	very often	very often	very often	very often	5	5	often	sometimes	5	5	very often	20	Diagnosed
female	2003	single	Siirt Üniversitesi	Faculty of Education	2nd year			yok	other	no	no	6-8 hour	no	yes	no	1 houren az	moderate	emin değilim	moderate	sometimes	often	sometimes	often	often	4	4	sometimes	sometimes	3	3	sometimes	14	Diagnosed
female	2005	single	Siirt üniversitesi	Faculty of Education	2nd year		3.4	Yaklaşık 5 ay önce	dentist	no	no	6-8 hour	no	yes	no	1-3 hour	very	emin değilim	yüksek	sıksık	sometimes	sometimes	rarely	sometimes	5	2	sometimes	often	3	3	sometimes	13	Diagnosed
female	2005	single	Çukurova	LAV	2nd year				psikiyatrist	yes	yes	4-6 hour	yes	yes	no	5 hourten fazla	hiç	no	yüksek	very often	very often	very often	very often	very often	5	4	never	very often	5	4	often	18	Not Diagnosed
female	2005	single	Çukurova Üniversitesi	Medicine	2nd year				other	no	no	4-6 hour	no	yes	no	3-5 hour	very	yes	yüksek	sıksık	sometimes	sometimes	rarely	often	3	3	sometimes	sometimes	3	3	rarely	12	Not Diagnosed
female	2003	single	Çukurova Üniversitesi	LAV	2nd year			Ağustos 2022	dentist	no	no	6-8 hour	no	yes	yes	5 hourten fazla	moderate	yes	yüksek	sometimes	never	often	rarely	sometimes	3	2	never	never	1	1	sometimes	7	Diagnosed	2022.0
female	2004	single	Siirt	Faculty of Education	2nd year				other	no	no	8 hourten fazla	yes	yes	no	1-3 hour	very	no	yüksek	sıksık	rarely	rarely	rarely	often	3	3	sometimes	often	2	4	rarely	12	Not Diagnosed
female	2006	single	Çukurova	LAV	1st year		3.8	6-7 ay önce	dentist	no	no	6-8 hour	no	yes	yes	1-3 hour	very	emin değilim	yüksek	very often	very often	often	often	very often	5	3	very often	sometimes	3	5	sometimes	16	Diagnosed
female	2004	single	Çukurova	LAV	2nd year			2020	dentist	no	no	8 hourten fazla	no	no	no	1-3 hour	very	emin değilim	yüksek	sıksık	often	often	often	often	5	4	sometimes	sometimes	3	3	often	15	Diagnosed	2020.0
male	2005	single	Çukurova	LAV	2nd year			2 yıl önce	other	no	no	6-8 hour	no	yes	yes	1-3 hour	very	emin değilim	yüksek	sıksık	sometimes	sometimes	often	often	4	3	sometimes	sometimes	2	2	sometimes	11	Diagnosed
female	2003	single	Çukurova Üniversitesi	LAV	3rd year			Tanı almadım ama problemim var	other	no	no	6-8 hour	no	no	no	1 houren az	very	emin değilim	yüksek	sıksık	often	often	often	often	4	4	sometimes	rarely	3	3	sometimes	14	Diagnosed
female	1997	single	İstanbul üniversitesi	Medical Secretaryship	2nd year			2018	dentist	no	no	8 hourten fazla	yes	yes	yes	5 hourten fazla	low	no	düşük	sometimes	often	sometimes	sometimes	sometimes	2	2	never	rarely	3	3	sometimes	10	Diagnosed	2018.0
female	2003	single	Çukurova	LAV	2nd year		2.18	08.2024	dentist	no	no	6-8 hour	yes	yes	no	1-3 hour	very	emin değilim	yüksek	sıksık	sometimes	often	very often	very often	3	3	rarely	often	3	3	sometimes	12	Diagnosed	2024.0
female	2005	single	Fırat Üniversitesi	Faculty of Education	2nd year		3.1		other	no	no	6-8 hour	no	yes	no	1-3 hour	moderate	no	moderate	sıksık	sometimes	often	very often	often	3	2	rarely	rarely	3	3	rarely	11	Not Diagnosed
female	2002	single	çukurova üni	LAV	3rd year				psikiyatrist	yes	yes	6-8 hour	yes	no	yes	1 houren az	very	emin değilim	yüksek	very often	very often	very often	very often	very often	5	5	sometimes	very often	3	5	very often	18	Not Diagnosed
female	2001	single	Çukurova	LAV	4th year		2.81	2016	dentist	no	no	6-8 hour	yes	yes	no	5 hourten fazla	very	emin değilim	yüksek	sıksık	sometimes	sometimes	often	rarely	2	1	rarely	rarely	2	3	sometimes	8	Diagnosed	2016.0
female		single	Van yüzüncü yıl üniversitesi	Faculty of Education	3rd year			Tanı almadım ama uykuda sıkıyorum	other	no	no	6-8 hour	yes	yes	no	1 houren az	very	emin değilim	yüksek	sıksık	very often	very often	very often	very often	5	5	sometimes	often	4	5	very often	19	Diagnosed
female	2002	single	Van yüzüncü yıl üniversitesi	Faculty of Education	4th year			2022	dentist	yes	yes	6-8 hour	no	no	no	1 houren az	very	emin değilim	moderate	sıksık	often	often	often	very often	5	5	sometimes	very often	5	5	very often	20	Diagnosed	2022.0
female	2004	single	Van yüzüncü yıl üniversitesi	Yaşlı bakım	2nd year			Ocak ayı gibi	dentist	no	no	8 hourten fazla	no	yes	no	3-5 hour	very	emin değilim	moderate	sometimes	very often	sometimes	rarely	rarely	2	4	rarely	rarely	3	3	sometimes	12	Diagnosed
female	2005	single	Dicle	Pharmacy	2nd year			Yok	other	yes	yes	6-8 hour	no	no	no	3-5 hour	hiç	no	yüksek	sıksık	very often	sometimes	very often	very often	5	5	very often	very often	5	5	very often	20	Diagnosed
male	2001	single	Adnan Menderes üniversitesi	Medicine	4th year			2023	dentist	no	no	6-8 hour	yes	yes	yes	1-3 hour	moderate	yes	moderate	sometimes	rarely	rarely	rarely	sometimes	3	3	sometimes	sometimes	3	3	sometimes	12	Diagnosed	2023.0
male	2000	single	Artvin Çoruh Üniversitesi	Faculty of Education	graduate		2.9	2018	dentist	no	no	6-8 hour	yes	no	no	1-3 hour	moderate	no	moderate	very often	often	sometimes	sometimes	rarely	3	4	sometimes	sometimes	3	2	sometimes	12	Diagnosed	2018.0
male	2002	single	Dicle Üniversitesi	Medicine	4th year			Tanı almadım ama çevremden duydum yaklaşık 2 yıldır	other	no	no	4-6 hour	no	yes	no	3-5 hour	very	yes	yüksek	sometimes	sometimes	rarely	sometimes	never	2	2	never	never	1	1	never	6	Diagnosed
male	2002	single	Dicle üniversitesi	Medicine	3rd year			14.11.2024	dentist	no	no	4 hourten az	yes	yes	no	1 houren az	low	no	yüksek	sometimes	rarely	sometimes	sometimes	sometimes	2	3	rarely	rarely	3	3	sometimes	11	Diagnosed	2024.0
female	2003	single	Dicle üniversitesi	Pharmacy	2nd year		82.0	Yok	other	no	no	6-8 hour	no	no	no	1-3 hour	moderate	emin değilim	moderate	sometimes	sometimes	sometimes	sometimes	sometimes	3	3	sometimes	sometimes	3	3	sometimes	12	Diagnosed
female	2003	single	Dicle üniversitesi	Medicine	3rd year			Almadım ama biliyorum	other	yes	yes	4-6 hour	yes	yes	no	1 houren az	very	yes	yüksek	sıksık	often	often	sometimes	often	3	4	often	often	3	3	rarely	13	Diagnosed
female	2004	single	dicle	Pharmacy	2nd year			2022	dentist	yes	yes	4-6 hour	yes	yes	no	1 houren az	moderate	yes	yüksek	very often	very often	very often	very often	very often	5	5	often	very often	5	5	very often	20	Diagnosed	2022.0
male	1999	married	Dicle	Pharmacy	3rd year				dentist	no	no	8 hourten fazla	no	no	no	1 houren az	very	emin değilim	yüksek	very often	sometimes	often	sometimes	sometimes	4	4	sometimes	sometimes	3	3	sometimes	14	Not Diagnosed
female	2003	single	Dicle üniversitesi	Pharmacy	3rd year				dentist	no	no	6-8 hour	no	yes	no	1-3 hour	moderate	emin değilim	yüksek	sometimes	often	rarely	very often	often	4	3	sometimes	sometimes	3	3	sometimes	13	Not Diagnosed
male	2003	single	Dicle üniversitesi	Pharmacy	2nd year		67.0	2020	psikiyatrist	yes	no	4-6 hour	no	yes	no	1-3 hour	very	yes	yüksek	very often	very often	very often	very often	very often	5	5	very often	very often	5	5	very often	20	Diagnosed	2020.0
female	2003	single	dicle	Pharmacy	2nd year				other	no	no	4-6 hour	no	no	no	1 houren az	moderate	emin değilim	moderate	sıksık	very often	very often	very often	often	5	5	often	often	4	4	often	18	Not Diagnosed
female	2004	single	Dicle üniversitesi	Pharmacy	1st year				nörolog	no	no	6-8 hour	no	yes	no	1-3 hour	very	yes	yüksek	sıksık	often	sometimes	rarely	very often	4	4	sometimes	sometimes	3	4	sometimes	15	Not Diagnosed
male	2005	single	Dicle üniversitesi	Pharmacy	1st year				dentist	no	no	4-6 hour	yes	yes	yes	1 houren az	very	yes	moderate	sometimes	often	sometimes	sometimes	rarely	3	3	sometimes	sometimes	3	3	sometimes	12	Not Diagnosed
male	2002	single	Dicle üniversitesi	Medicine	4th year			2024	other	no	no	4-6 hour	yes	yes	no	1 houren az	very	yes	yüksek	very often	very often	very often	very often	very often	5	5	very often	very often	5	5	very often	20	Diagnosed	2024.0
male	2001	single	Dicle üniversitesi	Medicine	4th year		81.0	21.03.2024	dentist	no	no	8 hourten fazla	no	no	no	3-5 hour	very	emin değilim	yüksek	sıksık	sometimes	sometimes	sometimes	sometimes	3	3	sometimes	sometimes	3	3	often	12	Diagnosed	2024.0
male	2000	single	Dicle üniversitesi	Medicine	graduate				dentist	no	no	6-8 hour	no	no	yes	1-3 hour	moderate	no	moderate	sometimes	sometimes	sometimes	sometimes	rarely	2	2	rarely	rarely	3	2	rarely	9	Not Diagnosed
female	2003	single	Bitlis Eren üniversitesi	Dentistry	3rd year			18 Mart	dentist	no	no	6-8 hour	yes	yes	no	1-3 hour	very	yes	yüksek	very often	often	often	often	often	4	5	very often	very often	3	3	often	15	Diagnosed
female	2000	single	Bitlis eren Üniversitesi	Dentistry	3rd year		3.14	Yok	other	no	no	6-8 hour	no	yes	no	1 houren az	moderate	emin değilim	moderate	sıksık	often	sometimes	sometimes	sometimes	3	3	sometimes	sometimes	2	2	rarely	10	Diagnosed
female	2001	single	24	Dentistry	3rd year		3.0		other	no	no	8 hourten fazla	no	yes	no	1-3 hour	low	emin değilim	moderate	sometimes	sometimes	sometimes	sometimes	often	4	3	often	often	3	3	sometimes	13	Not Diagnosed
female	2002	single	Bitlis Eren Üniversitesi	Dentistry	4th year		2.57		dentist	no	no	6-8 hour	no	yes	no	1-3 hour	very	yes	yüksek	sıksık	often	often	very often	often	4	4	sometimes	often	3	4	sometimes	15	Not Diagnosed
female	2003	single	Harran üniversitesi	Medical Secretaryship	1st year		3.17	2 yıl	psikiyatrist	yes	yes	6-8 hour	no	no	no	1 houren az	low	emin değilim	düşük	sometimes	sometimes	often	often	sometimes	5	4	sometimes	rarely	1	2	rarely	12	Diagnosed
male	2000	single	Osman gazi üniversitesi	Medical Secretaryship	2nd year		2.3	15şubat	dentist	no	no	6-8 hour	yes	yes	no	1 houren az	moderate	yes	moderate	sıksık	rarely	rarely	never	rarely	2	2	sometimes	rarely	2	3	sometimes	9	Diagnosed
female	2004	single	Yüzüncü yıl Üniversitesi	Medical Secretaryship	2nd year			13.12.2024	dentist	no	no	6-8 hour	no	no	no	1 houren az	moderate	no	düşük	sometimes	sometimes	sometimes	sometimes	rarely	3	4	often	often	4	4	often	15	Diagnosed	2024.0
female	2004	single	Yüzüncü yıl üniversitesi	Medical Secretaryship	2nd year		3.52		dentist	no	no	6-8 hour	no	yes	no	1 houren az	very	emin değilim	moderate	sıksık	very often	sometimes	often	very often	5	5	sometimes	often	3	3	very often	16	Not Diagnosed
female	2001	single	Yyü	Dentistry	graduate		26.0	2024	dentist	no	no	6-8 hour	no	no	yes	1-3 hour	low	yes	yüksek	rarely	rarely	sometimes	sometimes	sometimes	3	3	sometimes	sometimes	3	3	sometimes	12	Diagnosed	2024.0
female	2002	single	Yüzüncü yıl üniversitesi	Dentistry	3rd year			İki ay önce	dentist	no	no	6-8 hour	no	no	no	1-3 hour	moderate	yes	moderate	sıksık	often	sometimes	often	often	4	4	often	often	4	4	often	16	Diagnosed
female	2003	single	Van yüzüncüyıl üniversitesi	Dentistry	4th year		2.8	4 yıl önce	dentist	yes	yes	6-8 hour	yes	no	yes	1-3 hour	very	emin değilim	yüksek	very often	very often	very often	very often	very often	3	3	rarely	sometimes	2	3	sometimes	11	Diagnosed
female	2001	married	Eskişehir anadolu üniversitesi	Medical Secretaryship	1st year				other	no	no	6-8 hour	no	yes	no	1-3 hour	low	emin değilim	moderate	sometimes	sometimes	often	often	very often	5	5	sometimes	very often	5	5	very often	20	Not Diagnosed
male	2001	single	Yüzüncü Yıl	Dentistry	4th year				other	no	no	6-8 hour	yes	no	no	1 houren az	low	emin değilim	yüksek	sometimes	sometimes	sometimes	sometimes	sometimes	3	3	rarely	rarely	2	2	rarely	10	Not Diagnosed
male	2002	single	Van yyu	Dentistry	2nd year		3.5	2025	dentist	yes	yes	6-8 hour	yes	no	yes	1-3 hour	moderate	yes	moderate	sometimes	rarely	often	very often	sometimes	3	3	rarely	sometimes	2	3	sometimes	11	Diagnosed	2025.0
female	2004	single	Yüzüncüyıl üniversitesi	Dentistry	1st year				other	no	no	6-8 hour	no	yes	no	3-5 hour	very	yes	yüksek	sometimes	sometimes	sometimes	sometimes	sometimes	3	3	rarely	sometimes	3	3	sometimes	12	Not Diagnosed
female	2001	single	Yüzüncü yıl üniversitesi	Dentistry	4th year			2023	dentist	no	no	6-8 hour	no	yes	yes	1 houren az	hiç	no	yüksek	sıksık	often	often	often	often	4	4	sometimes	sometimes	2	2	sometimes	12	Diagnosed	2023.0
female	2001	single	Yüzüncü yıl üniversite si	Dentistry	graduate		3.0		dentist	no	no	6-8 hour	no	yes	no	1 houren az	moderate	yes	yüksek	sometimes	rarely	rarely	rarely	sometimes	3	2	rarely	rarely	2	2	rarely	9	Not Diagnosed
male	2001	single	Van Yüzüncü Yıl Üniversitesi	Medicine	4th year		74.0	2 yıl	dentist	no	no	6-8 hour	no	yes	yes	3-5 hour	very	yes	yüksek	very often	sometimes	often	often	often	4	4	rarely	often	3	3	often	14	Diagnosed
male	2003	single	Van Yüzüncü Yıl Ümiversitesi	Medicine	2nd year		79.0	2012 yılı ama net tarihi bilmiyorum	dentist	no	no	6-8 hour	no	yes	no	3-5 hour	very	yes	yüksek	sıksık	often	sometimes	rarely	never	3	2	often	often	3	5	often	13	Diagnosed	2012.0
female	2002	single	Yyü	Medicine	2nd year			2022	dentist	yes	yes	6-8 hour	yes	yes	yes	1 houren az	very	yes	yüksek	very often	sometimes	often	very often	very often	3	4	sometimes	often	3	4	sometimes	14	Diagnosed	2022.0
male	2002	single	Van Yyü	Medicine	4th year		73.0	Geçen yıl	dentist	no	no	6-8 hour	no	no	no	3-5 hour	moderate	no	moderate	sometimes	rarely	often	sometimes	often	4	4	sometimes	often	4	3	often	15	Diagnosed
male	2005	single	Van yüzüncü yıl	Medicine	2nd year			Eylül 2024	dentist	no	no	6-8 hour	no	yes	no	1 houren az	moderate	yes	yüksek	sıksık	often	very often	sometimes	very often	5	4	very often	sometimes	5	5	often	19	Diagnosed	2024.0
female	2006	single	Van yüzüncü yıl üniversitesi	Faculty of Education	1st year				dentist	no	no	4-6 hour	yes	yes	no	1 houren az	low	emin değilim	moderate	sıksık	often	very often	sometimes	often	3	3	sometimes	sometimes	3	3	sometimes	12	Not Diagnosed
female	2003	single	Yyü Medicine fak.	Medicine	2nd year				dentist	no	no	4-6 hour	no	no	no	1-3 hour	very	yes	yüksek	sıksık	often	often	sometimes	sometimes	3	2	rarely	rarely	2	3	rarely	10	Not Diagnosed
female	2004	single	Van Yüzüncü Yıl Üniversitesi	Faculty of Education	1st year			Dentistry sıkma	psikiyatrist	yes	yes	4-6 hour	no	no	no	1 houren az	moderate	emin değilim	moderate	very often	very often	very often	very often	very often	5	5	often	very often	5	5	very often	20	Diagnosed
female	2203	single	Van yüzüncü yıl	Medicine	3rd year				dentist	no	no	6-8 hour	no	no	no	1 houren az	very	emin değilim	moderate	sıksık	sometimes	very often	often	often	3	3	sometimes	sometimes	3	3	sometimes	12	Not Diagnosed
female	2003	single	Yüzüncü yıl üniversitesi	Faculty of Education	3rd year				other	yes	yes	6-8 hour	no	no	no	1-3 hour	moderate	emin değilim	moderate	sometimes	sometimes	often	rarely	sometimes	3	3	sometimes	sometimes	4	3	sometimes	13	Not Diagnosed
female	2001	single	Van yüzüncü yıl üniversitesi	Medicine	4th year		65.0	2024	dentist	no	no	6-8 hour	yes	yes	no	1-3 hour	moderate	emin değilim	yüksek	sıksık	sometimes	often	sometimes	sometimes	4	2	rarely	rarely	4	3	sometimes	13	Diagnosed	2024.0
male	2001	single	Van yüzüncü yıl üniversitesi	Medicine	4th year		61.0	Yok	other	no	no	6-8 hour	no	yes	no	1-3 hour	very	emin değilim	yüksek	rarely	rarely	rarely	rarely	rarely	2	2	rarely	rarely	2	2	rarely	8	Diagnosed
male	2001	single	Van yüzüncü yıl üniversitesi	Medicine	4th year		72.0	2022	dentist	yes	no	6-8 hour	yes	yes	yes	1-3 hour	moderate	emin değilim	yüksek	sometimes	sometimes	sometimes	rarely	sometimes	3	2	never	never	2	2	rarely	9	Diagnosed	2022.0
female	2002	single	Yüzüncü Yıl üniversitesi	Medicine	4th year			2023	dentist	no	no	6-8 hour	no	yes	no	1-3 hour	moderate	emin değilim	yüksek	sıksık	sometimes	sometimes	rarely	rarely	3	3	rarely	rarely	2	3	sometimes	11	Diagnosed	2023.0
male	2000	single	Van Yüzüncü Yıl Üniversitesi	Medicine	4th year		71.56	2024	psikiyatrist	no	no	4-6 hour	no	yes	yes	1 houren az	moderate	yes	yüksek	sıksık	often	very often	sometimes	sometimes	4	3	sometimes	sometimes	3	4	often	14	Diagnosed	2024.0
female	2005	single	Yyü	Medical Secretaryship	2nd year		3.23		other	no	no	6-8 hour	no	yes	no	1-3 hour	low	yes	moderate	sıksık	sometimes	very often	very often	often	4	4	very often	often	5	4	often	17	Not Diagnosed
male	1999	single	Lisans	Dentistry	graduate			2020	dentist	no	no	4-6 hour	yes	yes	yes	1 houren az	moderate	yes	yüksek	very often	often	sometimes	sometimes	often	4	4	rarely	often	3	4	often	15	Diagnosed	2020.0
female	2000	single	Van Yüzüncü Yıl Üniversitesi	Dentistry	graduate		2.67	2024	dentist	no	no	6-8 hour	no	no	no	1 houren az	very	yes	yüksek	very often	very often	often	very often	very often	5	4	very often	often	5	4	often	18	Diagnosed	2024.0
male	1999	single	Van yuzuncu yil üniversitesi	Dentistry	4th year			2021	dentist	no	no	4-6 hour	no	no	no	1-3 hour	low	no	yüksek	sometimes	rarely	rarely	rarely	rarely	2	2	never	never	1	1	never	6	Diagnosed	2021.0
female	2000	single	Van yyü	Dentistry	graduate		3.18	2023	dentist	no	no	6-8 hour	no	no	no	3-5 hour	very	yes	yüksek	sıksık	often	often	often	often	3	3	sometimes	sometimes	3	3	sometimes	12	Diagnosed	2023.0
female	2003	single	Van yüzüncü yıl üniversitesi	Dentistry	graduate		2.6	20023	dentist	no	no	6-8 hour	no	yes	no	3-5 hour	very	yes	yüksek	sıksık	sometimes	sometimes	sometimes	sometimes	3	3	sometimes	sometimes	3	3	rarely	12	Diagnosed	2002.0
female	2002	single	Ankara medipol	Medical Secretaryship	4th year			2024	dentist	no	no	8 hourten fazla	yes	yes	no	1 houren az	moderate	yes	yüksek	sometimes	rarely	rarely	sometimes	sometimes	3	3	sometimes	sometimes	2	3	sometimes	11	Diagnosed	2024.0
female	2002	single	Ankara Medipol Üniversitesi	Medical Secretaryship	4th year		3.0	2023	dentist	no	no	6-8 hour	yes	yes	yes	1-3 hour	moderate	yes	moderate	sometimes	never	rarely	rarely	rarely	2	2	never	never	1	1	never	6	Diagnosed	2023.0
male	2001	single	Yüzüncü yıl üniversitesi	Dentistry	graduate			2023	dentist	no	no	6-8 hour	yes	yes	no	1 houren az	low	emin değilim	yüksek	very often	very often	often	very often	very often	4	4	often	often	3	4	sometimes	15	Diagnosed	2023.0
female	2000	single	Ankara Medipol üniversitesi	Medical Secretaryship	3rd year				other	no	no	6-8 hour	no	no	no	1-3 hour	very	emin değilim	yüksek	sometimes	often	often	sometimes	sometimes	3	3	sometimes	sometimes	3	3	sometimes	12	Not Diagnosed
female	2000	single	Van yüzüncü yıl üniversitesi	Dentistry	graduate			2014	dentist	no	no	4-6 hour	no	yes	no	1-3 hour	very	yes	yüksek	sıksık	often	often	often	often	4	4	often	often	4	4	often	16	Diagnosed	2014.0
female	200	single	Van Yüzüncü Yıl Üniversitesi	Dentistry	4th year				dentist	no	no	6-8 hour	no	no	yes	1-3 hour	very	yes	yüksek	sıksık	sometimes	very often	often	often	4	4	often	often	4	4	often	16	Not Diagnosed
female	2003	single	Van yüzüncü yıl üniversitesi	Dentistry	2nd year			2023	dentist	no	no	6-8 hour	yes	yes	no	1-3 hour	moderate	emin değilim	moderate	sıksık	often	sometimes	often	sometimes	3	3	sometimes	sometimes	3	3	sometimes	12	Diagnosed	2023.0
female	05/08/2004	single	Van yüzüncü yıl üniversitesi	Dentistry	1st year			İki yıl	other	no	no	8 hourten fazla	no	no	no	1-3 hour	moderate	yes	yüksek	sometimes	often	often	often	sometimes	3	4	sometimes	sometimes	4	3	sometimes	14	Diagnosed
female	2003	single	Van yüzüncü yıl	Dentistry	1st year			2022	dentist	no	no	6-8 hour	no	yes	yes	1 houren az	low	emin değilim	moderate	rarely	never	very often	often	often	3	3	never	rarely	3	2	sometimes	11	Diagnosed	2022.0
female	2004	single	Van yüzüncü yıl	Dentistry	1st year			1 yıl önce	other	no	no	6-8 hour	no	no	no	1-3 hour	moderate	yes	moderate	sometimes	often	sometimes	often	often	3	4	very often	often	3	3	sometimes	13	Diagnosed
female	2004	single	Van yüzüncü yıl üniversitesi	Dentistry	1st year			2022	dentist	no	no	6-8 hour	no	no	no	3-5 hour	moderate	yes	moderate	sıksık	often	often	often	often	4	4	often	often	4	4	often	16	Diagnosed	2022.0
male	2001	single	Yyü	Dentistry	graduate		2.7	Bugün	dentist	no	no	4-6 hour	no	no	yes	1 houren az	hiç	no	moderate	never	sometimes	sometimes	rarely	rarely	2	2	rarely	often	2	2	rarely	8	Diagnosed
female	2006	single	Van yyü universitesi	Dentistry	1st year			2024	other	no	no	6-8 hour	no	no	no	1-3 hour	very	emin değilim	yüksek	sıksık	often	often	often	sometimes	4	4	often	often	4	4	often	16	Diagnosed	2024.0
female	2004	single	Van Yüzüncü Yıl Üniversitesi	Dentistry	1st year		3.04	2024	dentist	no	no	8 hourten fazla	no	no	no	1 houren az	moderate	yes	yüksek	sometimes	often	often	sometimes	often	3	3	often	sometimes	3	3	often	12	Diagnosed	2024.0
female		single	Van yyü	Medicine	2nd year			2018	dentist	no	no	8 hourten fazla	no	no	no	1-3 hour	moderate	yes	yüksek	sıksık	sometimes	sometimes	sometimes	rarely	2	3	rarely	rarely	2	2	sometimes	9	Diagnosed	2018.0
male	2002	single	Yyü	Medicine	4th year		72.0	Almadım	other	no	no	6-8 hour	yes	yes	yes	3-5 hour	very	no	yüksek	sometimes	rarely	rarely	rarely	rarely	2	2	rarely	rarely	2	2	rarely	8	Diagnosed
male	2000	single	Akdeniz üniversitesi	Faculty of Education	3rd year		2.23	Yok	other	no	no	8 hourten fazla	no	no	no	1 houren az	moderate	no	yüksek	rarely	sometimes	never	sometimes	rarely	3	2	sometimes	rarely	2	2	rarely	9	Diagnosed
female	2005	single	Van yüzüncü yıl	Dentistry	2nd year				other	no	no	8 hourten fazla	no	yes	no	3-5 hour	very	yes	yüksek	sıksık	often	often	often	often	4	4	often	often	3	4	often	15	Not Diagnosed
female	2001	single	Van yyü	Dentistry	4th year		76.0	2020	dentist	no	no	6-8 hour	yes	yes	no	1 houren az	moderate	yes	yüksek	sometimes	sometimes	sometimes	sometimes	sometimes	3	3	sometimes	sometimes	3	3	sometimes	12	Diagnosed	2020.0
